# Supplementary material
Source: Springer Nature journal article supplement (https://www.springermedizin.de/resource/supplementary/13054_2011_9741_MOESM1_ESM.pdf/9706672)

### Kaplan-Meier

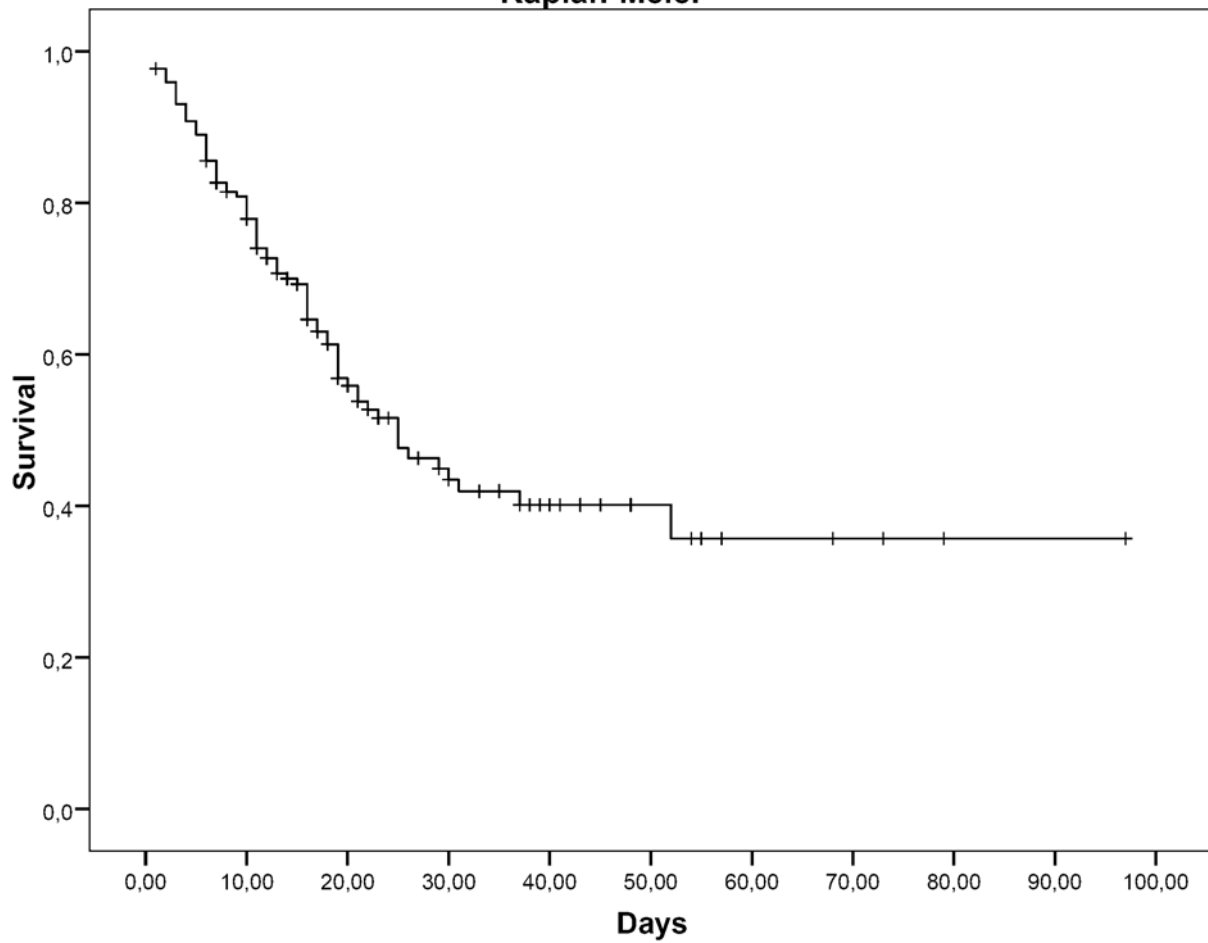

Supplement: MOESM1 [file 9706672]
